# Blood Cholesterol Trends 2001–2011 in the United States: Analysis of 105 Million Patient Records

Harvey W. Kaufman<sup>1\*</sup>, Amy J. Blatt<sup>2</sup>, Xiaohua Huang<sup>2</sup>, Mouneer A. Odeh<sup>1</sup>, H. Robert Superko<sup>3,4</sup>

**1** Quest Diagnostics, Madison, New Jersey, United States of America, **2** Quest Diagnostics, West Norriton, Pennsylvania, United States of America, **3** Celera (a Quest Diagnostics company), Alameda, California, United States of America, **4** Saint Joseph's Hospital of Atlanta, Atlanta, Georgia, United States of America

## Abstract

**Objectives:** We report annual trends in low density lipoprotein cholesterol (LDL-C) from an in-care patient population of nearly 105 million adults across the United States (U.S.), from 2001 through 2011.

**Background:** Average blood cholesterol values have declined in the U.S. since at least 1960. The National Health and Nutrition Examination Survey (NHANES) reported declining blood cholesterol values from 1999 through 2010. In the absence of more recent published data, we examined LDL-C values from a single clinical laboratory database to determine whether these values continued to decline through 2011.

**Methods and Results:** We extracted almost 247 million LDL-C results from nearly 105 million adults who received diagnostic testing from a single national clinical laboratory. Annual age-adjusted mean LDL-C values were calculated, and analyzed by gender. Piecewise regression analysis of the total study population indicates a breakpoint, or change in slope, in the years following 2008 ( $F = 163.13$ ;  $p < 0.05$ ). Between 2001 and 2008, the average rate of annual decline was  $-2.05$  mg/dL (95% CI  $[-2.35, -1.75]$ ). After 2008, mean LDL-C levels flattened out, with a slope not statistically different from zero (slope =  $-0.10$  mg/dL/year; 95% CI  $[-1.46, 1.26]$ ). This stabilization was observed in both genders and all age ranges, and was also reflected in the percentage of results in low- and high-risk categories.

**Conclusions:** The trends reported suggest historical progress in decreasing LDL-C levels, observed from 2001–2008, may have stalled in recent years. Further research is needed to determine the cause of the observed trends and develop new strategies to reduce lipid-based cardiovascular risk further.

**Citation:** Kaufman HW, Blatt AJ, Huang X, Odeh MA, Superko HR (2013) Blood Cholesterol Trends 2001–2011 in the United States: Analysis of 105 Million Patient Records. PLoS ONE 8(5): e63416. doi:10.1371/journal.pone.0063416

**Editor:** Shengxu Li, Tulane School of Public Health and Tropical Medicine, United States of America

**Received:** October 12, 2012; **Accepted:** April 2, 2013; **Published:** May 10, 2013

**Copyright:** © 2013 Kaufman et al. This is an open-access article distributed under the terms of the Creative Commons Attribution License, which permits unrestricted use, distribution, and reproduction in any medium, provided the original author and source are credited.

**Funding:** The authors have no support or funding to report.

**Competing Interests:** The authors are employees of Quest Diagnostics and Celera (a Quest Diagnostics company.) HW Kaufman, X Huang, MA Odeh, and HR Superko also own stock in the Company. There are no patents, products in development or marketed products to declare. This does not alter the authors' adherence to all the PLOS ONE policies on sharing data and materials, as detailed online in the guide for authors.

\* E-mail: Harvey.W.Kaufman@QuestDiagnostics.com

## Introduction

Average blood cholesterol values, the primary cardiovascular disease biomarker, have declined in the United States (U. S.) since at least 1960 [1,2,3,4]. Between 1999 and 2010, the National Health and Nutrition Examination Survey (NHANES) reported blood cholesterol values were decreasing. The decline in hypercholesterolemia, observed in the past decade, is most likely associated with a number of physiological and behavioral factors, such as an increased awareness of lipid disorders, increased use of lipid-lowering medication (i.e., statins), improvements in diet, and reductions in trans-fat consumption [5,6].

These trends are also reflected in the mortality rates attributable to cardiovascular disease, which declined by approximately 60% from 1970 through 2000, and by 30.6% from 1998 through 2007. Approximately 47% of the decline in coronary heart disease from 1980 to 2000 in the U.S. was attributable to increased use of evidence-based medical therapies, while 44% was attributable to changes in risk factors associated with lifestyle and the environment [7]. Despite these

improvements, cardiovascular disease still accounted for one in three deaths in the U.S. in 2007 [8].

Building on this research, the American Heart Association (AHA) 2020 Strategic Impact Goals target a 20% relative improvement in overall cardiovascular health for all Americans, using a combination of four health behaviors (smoking, diet, physical activity, and body weight) and three health factors (glucose, cholesterol, and blood pressure) metrics [9].

The purpose of this study is to provide more recent trends in low density lipoprotein cholesterol (LDL-C) across a wide spectrum of patients representative of real-world medical practices across the U. S. We examined almost 247 million results derived from a single clinical laboratory database from an in-care patient population of nearly 105 million adults, and analyzed these 11-year trends through 2011 by gender and age ranges.

## Methods

Quest Diagnostics has over 145 million patient encounters each year across the United States. Test results are stored in the

Quest Diagnostics Informatics Data Warehouse, which is the largest private clinical laboratory data warehouse in the United States and stores approximately 3 billion test results annually. For this Quest Diagnostics Health Trends® study, we extracted testing data for individual patients as described below; all data were de-identified prior to analysis. This study was determined to be exempt from institutional review by the Western Institutional Review Board.

The LDL-C testing methodology was consistent throughout the study period of January 1, 2001 through December 31, 2011 (total cholesterol and triglyceride reagents were from Beckman Coulter, Inc., Brea, California; the HDL-C reagent was from Roche Diagnostics, Indianapolis, IN). All testing was performed with Olympus analyzers (Beckman Coulter). LDL-C was calculated only if the triglycerides concentration was  $\leq 400$  mg/dL [10]. Accordingly, specimens were not included in this analysis if the triglycerides concentration exceeded 400 mg/dL. For the measured components of the lipid panel, the coefficient of variation of the control materials during the study period was consistently  $< 5\%$ .

Patients were included in the study if they were at least 18 years old at the time of the blood collection event and the ordering physician requested a lipid panel with a calculated LDL-C test during our 11-year study period. Patients ages 18 and 19 years were included to provide insights into this younger age cohort.

To measure long-term trends, we calculated annual age-adjusted mean LDL-C values from calendar years 2001–2011, using the Census 2000 population as the standard population [11,12]. For patients with multiple test results during a calendar year, the annual mean LDL-C level was calculated and used in the analysis for that year; hence, every patient had only one value entered into the analysis dataset for each calendar year. Likewise, the average age of each patient was calculated during that year and was entered into the analysis dataset for that calendar year.

In addition, we also examined the percentage of the patient population that was in each of the following LDL-C categories each year (as defined by the National Cholesterol Education Program Expert Panel on Detection, Evaluation, and Treatment of High Blood Cholesterol in Adults, Adult Treatment Panel III [13]):  $< 100$  mg/dL, 100 to 129 mg/dL, 130 to 159 mg/dL, and  $\geq 160$  mg/dL.

Piecewise regression analysis was used to assess the existence and placement of breakpoints, as well as the non-linearity of the trends between 2001 and 2011 (a logit transformation was used when the data are presented as percentages); analysis of covariance was performed to assess differences in trends between genders and age groups; an analysis of variance was performed to assess the differences among age groups, in each year. The Bonferroni method was used in the analysis of variance to adjust for multiple comparisons [14]. Levels of statistical significance were set at  $p < 0.05$  for all tests. SAS 9.2 (SAS Institute Inc., Cary, North Carolina) was used for all data analyses.

## Results

### Age and Gender Distributions of Study Population in 2001 and 2011

The age and gender distributions of the study population remained relatively stable throughout the study period. The proportion of women increased slightly (from 54.3% in 2001 to 55.0% in 2011; Table 1). Overall, mean age increased by approximately 3 years (from 54.8 in 2001 to 57.8 years in 2011).

### LDL-C Trends Over 11 Years

246,717,189 test results from 104,690,326 patients aged 18 years and above were included in the analysis. Because average LDL-C values and average ages were used for each patient during each year, there were 195,050,298 observations in the dataset.

Over the 11-year period, there was a net 13% decline in the annual age-adjusted mean LDL-C level for the entire study population, from 120.0 mg/dL in 2001 to 104.3 mg/dL in 2011 (Figure 1). Piecewise regression analysis indicates a breakpoint, or change in slope, in the years following 2008 ( $F = 163.61$ ;  $p < 0.05$ ;  $MSE = 0.67$ ) (Table 2). Between 2001 and 2008, the average rate of annual decline was  $-2.05$  mg/dL (95% CI  $[-2.35, -1.75]$ ). The annual age-adjusted mean LDL-C declined from 120.0 mg/dL in 2001 to 104.7 mg/dL in 2008. After 2008, mean LDL-C levels flattened out, with a slope not statistically different from zero (slope =  $-0.10$  mg/dL/year; 95% CI  $[-1.46, 1.26]$ ). The annual age-adjusted mean LDL-C was 104.5 mg/dL in 2009 and 104.3 mg/dL in 2011.

There was a net 13.4% decline in the annual age-adjusted mean LDL-C level for the male population, from 121.3 mg/dL in 2001 to 105.0 mg/dL in 2011 (Figure 1). Piecewise regression analysis indicates a breakpoint in the years following 2008 ( $F = 209.37$ ;  $p < 0.05$ ;  $MSE = 0.56$ ) (Table 2). Between 2001 and 2008, the average rate of annual decline was  $-2.12$  mg/dL (95% CI  $[-2.40, -1.85]$ ). The annual age-adjusted mean LDL-C declined from 121.3 mg/dL in 2001 to 105.5 mg/dL in 2008. After 2008, mean LDL-C levels flattened out, with a slope not statistically different from zero (slope =  $-0.18$  mg/dL/year; 95% CI  $[-1.44, 1.07]$ ). The annual age-adjusted mean LDL-C was 105.3 mg/dL in 2009 and 105.0 mg/dL in 2011.

There was a net 12.5% decline in the annual age-adjusted mean LDL-C level for the female population, from 119.1 mg/dL in 2001 to 104.2 mg/dL in 2011 (Figure 1). Piecewise regression analysis indicates a breakpoint in the years following 2008 ( $F = 132.83$ ;  $p < 0.05$ ;  $MSE = 0.75$ ) (Table 2). Between 2001 and 2008, the average rate of annual decline was  $-1.96$  mg/dL (95% CI  $[-2.28, -1.65]$ ). The annual age-adjusted mean LDL-C declined from 119.1 mg/dL in 2001 to 104.4 mg/dL in 2008. After 2008, mean LDL-C levels flattened out, with a slope not statistically different from zero (slope =  $0.001$  mg/dL/year; 95% CI  $[-1.45, 1.45]$ ). The annual age-adjusted mean LDL-C was 104.2 mg/dL in 2009 and 104.2 mg/dL in 2011. Between 2001 and 2008, the slope coefficients for males and females were not significantly different ( $p = 0.711$ ) (Figure 1).

Piecewise regression analysis of the annual mean LDL-C levels by age range indicates a breakpoint in the years following 2008 ( $F = 285.39$ ;  $p < 0.05$ ;  $MSE = 0.87$ ). Between 2001 and 2008, annual age-adjusted mean LDL-C levels declined significantly among all age ranges ( $p < 0.05$ ), and the rate of decline differed by age range ( $p < 0.05$ ) (Figure 2). Patients in the 80+ year age group had the greatest overall rate of decline (slope =  $-2.9$  mg/dL/year), and patients in the 18–19 year age group had the smallest overall rate of decline (slope =  $-1.4$  mg/dL/year). Between 2009 and 2011, the rate of decline did not differ by age range ( $p = -0.374$ ).

The percentage of patients with LDL-C of  $< 100$  mg/dL (classified as low-risk) increased from 26.0% in 2001 to 46.3% in 2011; while the percentage of patients with LDL-C of  $\geq 160$  mg/dL (classified as high-risk) declined from 13.7% in 2001 to 6.0% in 2011 (Figure 3). Between 2001 and 2008, the percentage of patients with LDL-C of  $< 100$  mg/dL increased from 26.0% to 45.6%, while the percentage of patients with LDL-C of  $\geq 160$  mg/dL declined from 13.7% in 2001 to 6.1% in 2008. The percentage of patients with LDL-C of  $< 100$  mg/dL increased from 45.8% in

**Table 1.** Age and gender distribution of study population at endpoints of study period (2001 and 2011).

| Age Group (Years) | 2001 Total<br>Number (%) | 2001 Males<br>Number (%) | 2001 Females<br>Number (%) | 2011 Total<br>Number (%) | 2011 Males<br>Number (%) | 2011 Females<br>Number (%) |
|-------------------|--------------------------|--------------------------|----------------------------|--------------------------|--------------------------|----------------------------|
| 18 to 19          | 92,552 (0.7)             | 40,727 (0.7)             | 51,825 (0.7)               | 200,328 (1.0)            | 88,906 (0.9)             | 111,422 (1.0)              |
| 20 to 29          | 840,456 (6.2)            | 346,164 (5.6)            | 494,292 (6.7)              | 1,306,974 (6.3)          | 542,814 (5.8)            | 764,160 (6.7)              |
| 30 to 39          | 1,838,570 (13.5)         | 851,791 (13.7)           | 986,779 (13.4)             | 2,218,068 (10.7)         | 971,290 (10.4)           | 1,246,778 (10.9)           |
| 40 to 49          | 2,933,040 (21.6)         | 1,387,940 (22.3)         | 1,545,100 (20.9)           | 3,818,752 (18.4)         | 1,775,389 (19.0)         | 2,043,363 (17.9)           |
| 50 to 59          | 3,255,415 (23.9)         | 1,554,209 (25.0)         | 1,701,206 (23.0)           | 4,980,048 (23.9)         | 2,331,366 (24.9)         | 2,648,682 (23.2)           |
| 60 to 69          | 2,312,363 (17.0)         | 1,089,741 (17.5)         | 1,222,622 (16.6)           | 4,360,664 (21.0)         | 2,002,505 (21.4)         | 2,358,159 (20.6)           |
| 70 to 79          | 1,653,456 (12.2)         | 699,323 (11.3)           | 954,133 (12.9)             | 2,544,588 (12.2)         | 1,130,205 (12.1)         | 1,414,383 (12.4)           |
| 80+               | 668,313 (4.9)            | 240,496 (3.9)            | 427,817 (5.8)              | 1,365,101 (6.6)          | 517,317 (5.5)            | 847,784 (7.4)              |
| Total             | 13,594,165 (100)         | 6,210,391 (100)          | 7,383,774 (100)            | 20,794,523 (100)         | 9,359,792 (100)          | 11,434,731 (100)           |

doi:10.1371/journal.pone.0063416.t001

2009 to 46.3% in 2011, while the percentage of patients with LDL-C of  $\geq 160$  mg/dL was 5.99% in both 2009 and 2011.

Piecewise logit regression analysis of the percentage of patients in low- and high-risk categories indicates a breakpoint in the years following 2008 ( $F = 1525.99$ ;  $p < 0.05$ ;  $MSE = 0.0012$ ).

## Discussion

The current study adds to the body of scientific knowledge by showing that the declining LDL-C trends previously reported by

NHANES may have halted since 2008 [1,2]. We examined the LDL-C results of nearly 105 million unique patients from 2001 to 2011, in what is believed to be the largest nationally-based retrospective study of LDL-C trends reported to-date. Other studies that have examined population trends in LDL-C have been constrained by smaller populations, shorter study periods, and smaller geographical coverage [1,2,3,4]. Furthermore, our study reported data annually whereas most recently published studies report results in time periods that cover multiple years – which mask the plateau observed in our study. Finally, our study is the

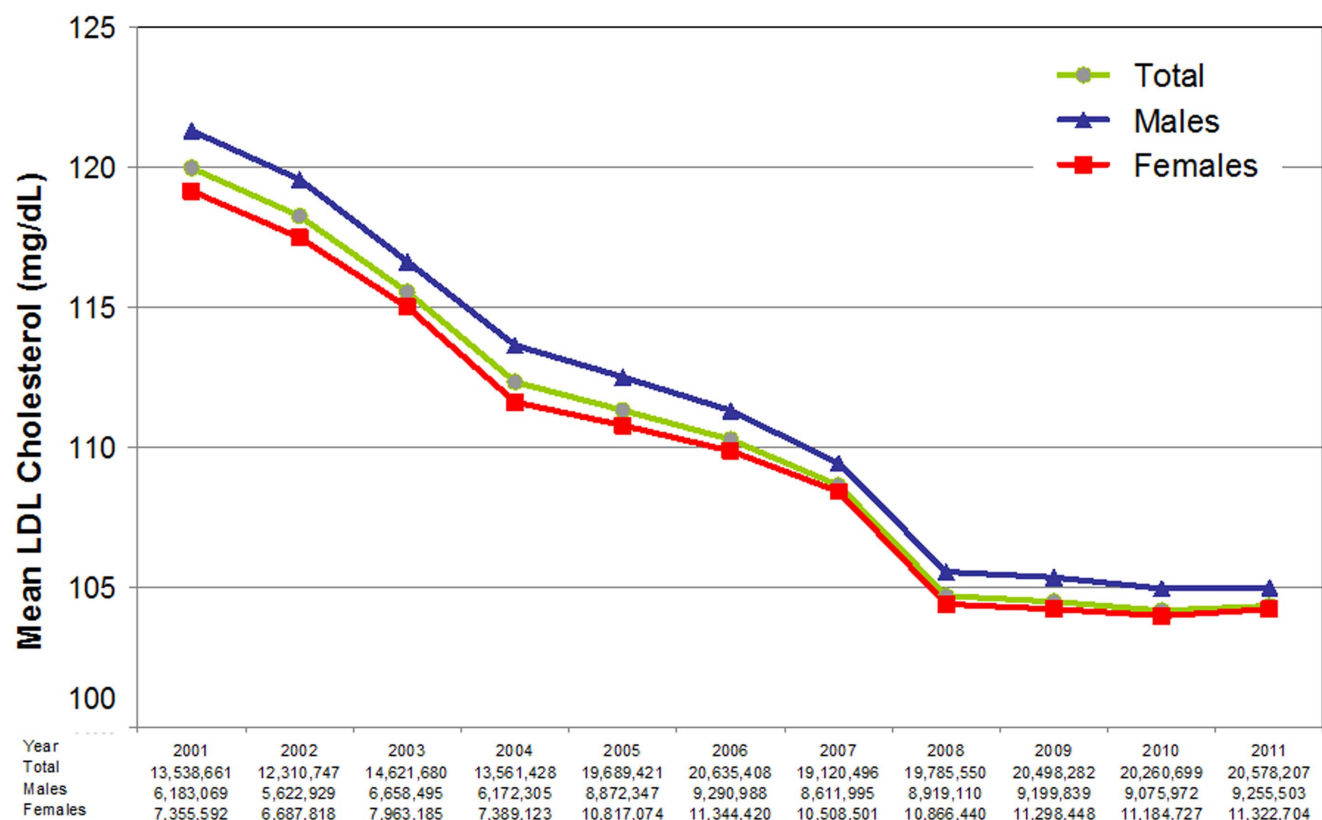

**Figure 1. Annual age-adjusted mean LDL-C levels for the total population, and by gender, 2001–2011.** 95% confidence intervals (not shown) range from  $\pm 0.1$  mg/dL to  $\pm 0.3$  mg/dL for all groups.

doi:10.1371/journal.pone.0063416.g001

**Table 2.** Piecewise regression results for the total study population, and by gender.

| Parameter <sup>a</sup>                | Overall Population Estimate<br>[Approximate 95% CI] | Male Population Estimate<br>[Approximate 95% CI] | Female Population Estimate<br>[Approximate 95% CI] |
|---------------------------------------|-----------------------------------------------------|--------------------------------------------------|----------------------------------------------------|
| Intercept of Segment 1 (2001 to 2008) | 4221.8 [3625.3, 4818.4]                             | 4367.0 [3819.2, 4914.9]                          | 4047.7 [3413.3, 4682.2]                            |
| Slope of Segment 1 (2001 to 2008)     | -2.05 [-2.35, -1.75]                                | -2.12 [-2.40, -1.85]                             | -1.96 [-2.28, -1.65]                               |
| Slope of Segment 2 (2009 to 2011)     | -0.10 [-1.46, 1.26]                                 | -0.18 [-1.44, 1.07]                              | 0.001[-1.45, 1.45]                                 |
| F-statistic                           | 163.61 <sup>b</sup>                                 | 209.37 <sup>b</sup>                              | 132.83 <sup>b</sup>                                |
| MSE                                   | 0.67                                                | 0.56                                             | 0.75                                               |

<sup>a</sup>The piecewise regression equation for the period of study prior to the estimated breakpoint is:  $y = a + b_1 * \text{year}$ . The piecewise regression equation for the period of study after the estimated breakpoint is:  $y = a + c * (b_1 - b_2) + b_2 * \text{year}$ . ( $a$  = intercept of segment 1;  $b_1$  = slope of segment 1;  $b_2$  = slope of segment 2;  $c$  = estimated breakpoint).

<sup>b</sup> $p < 0.05$ .

doi:10.1371/journal.pone.0063416.t002

first large-scale study to report data from 2009, 2010 and 2011 [3,4,5].

In the current study, the annual age-adjusted mean LDL-C level in 2001 was similar to that reported by NHANES for the same time period (120.0 mg/dL), although the two studies are based on different study methodologies. In addition, the percent of individuals with desirable LDL-C levels (<100 mg/dL) in the earlier NHANES III period (1988–2004) is similar to for the current study's findings for 2001 (23% versus 26%) [2].

In contrast to the gradual decline reported in NHANES, we observed a 13% decline in LDL-C from 2001–2011 (120.0 mg/dL to 104.3 mg/dL). Since every 10 mg/dL decline in LDL-C is associated with an approximately 5% to 13% reduction in major vascular disease events and mortality, the 16 mg/dL decline we

observed is approximately equivalent to a 8% to 21% decline in cardiovascular disease mortality, without consideration of changes over time in other risk factors [15].

A key observation from the current study is that the decrease in LDL-C levels through 2008 and has remained virtually flat since. This plateau was observed for all ages and both genders. It is beyond the scope of the current study to demonstrate how specific changes in medical practice and patient behaviors have affected our study's observations. However, this observation suggests that the AHA goal of a 20% improvement in cardiovascular health may be difficult to obtain by 2020 [9].

The decline in annual age-adjusted mean LDL-C was greater among men than women during the 11-year period. Though not statistically significant, this difference may reflect meaningful

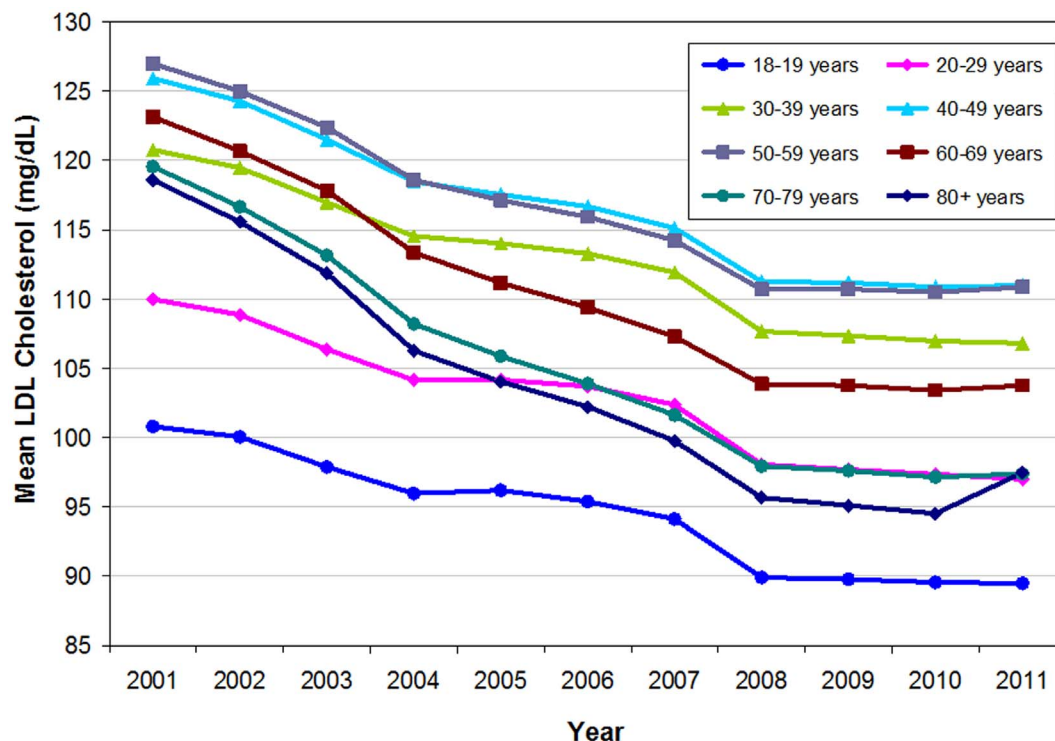

**Figure 2. Annual mean LDL-C levels, by age group, 2001–2011.** 95% confidence intervals (not shown) range from  $\pm 0.1$  mg/dL to  $\pm 0.3$  mg/dL for all groups.

doi:10.1371/journal.pone.0063416.g002

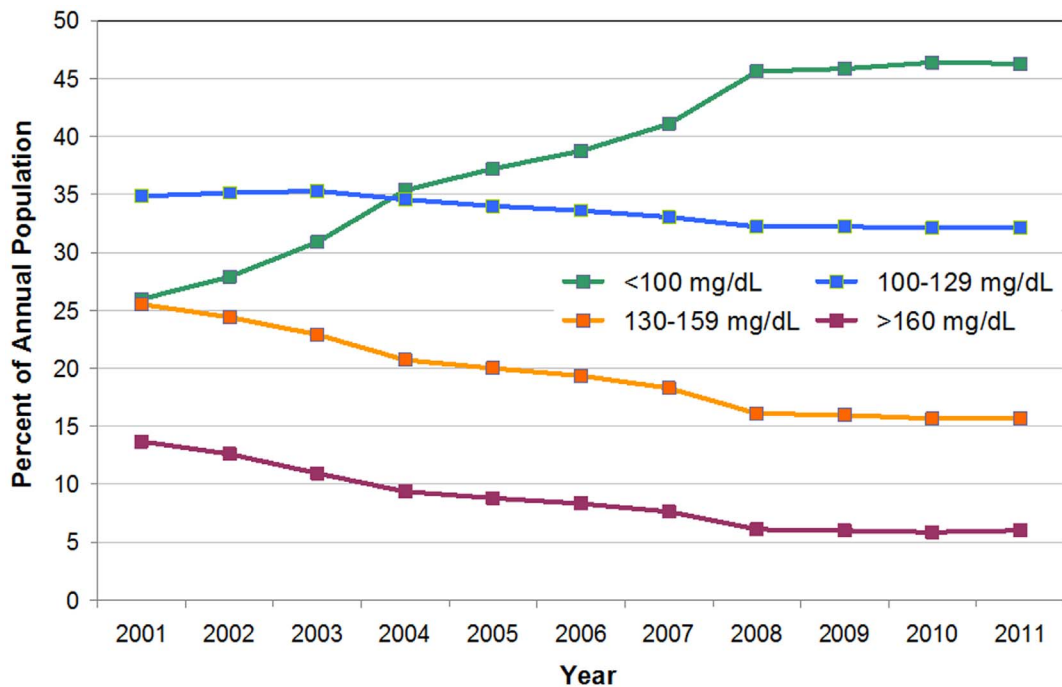

**Figure 3. Distribution of LDL-C category, 2001–2011.**  
doi:10.1371/journal.pone.0063416.g003

differences in the prescription rate and effectiveness of lipid-lowering interventions, including statins and lifestyles, between the genders. Other studies have observed different effects of statins on men compared to women; some have indicated a possibly greater cardiovascular risk reduction among men [16,17], while others suggested that statins were as effective in women as in men, or even more so [18–24]. Furthermore, the observed differences in LDL-C levels may, in part, be due to differences in under-appreciation of heart disease risk in women [25], as the first women-specific guidelines were published by the AHA in 1999, and new algorithms for risk classification in women were not published until 2007 [26,27].

The current study has several limitations. By definition, the population in this study represents in-care patients from all 50 states and the District of Columbia seeking physician-ordered laboratory testing and does not necessarily reflect the population profiles of the general adult U.S. population. In addition, we did not have access to clinical information including changes in lifestyle and medication. Furthermore, although changes in laboratory methodology could account for apparent trends in LDL-C, this is unlikely since the laboratory methods were standardized throughout the study period [28]. In addition, Quest

Diagnostics laboratories are all CLIA-certified and participate in standardization and proficiency testing programs. As noted in the Methods, analytical precision was consistent throughout the study period for all of the performing laboratories.

Population-based blood cholesterol levels have been declining in the U.S. for a long time, probably since at least the 1960s, when data from the National Health and Examination Survey (predecessor to NHANES) first became available. This study of nearly 105 million in-care patients, from a major laboratory database, reports a decline in LDL-C levels during the 2001 to 2008 period (for both men and women of all adult age ranges), followed by a period of stabilization from 2008 to 2011. Although many of our observations require more research to fully understand the underlying dynamics, our study suggests that our half-century of progress in improving LDL-C levels may have suddenly stalled since 2008.

### Author Contributions

Conceived and designed the experiments: HWK AJB XH MAO HRS. Analyzed the data: HWK AJB XH MAO HRS. Wrote the paper: HWK AJB XH MAO HRS.

### References

- Carroll MD, Kit BK, Lacher DA, Shero ST, Mussolino ME (2012) Trends in Lipids and Lipoproteins in US Adults, 1988–2010. *JAMA* 308(15): 1545–1554. doi: 10.1001/jama.2012.13260.
- Carroll MD, Lacher DA, Sorlie PD (2011) 30-year trends in serum lipids among United States adults: results from the national health and nutrition examination surveys II, III, and 1999–2006. *Am J Cardio*. 107(12): 1868–70.
- Kuklina EV, Yoon PW, Keenan NL (2009) Trends in high levels of low-density lipoprotein cholesterol in the United States, 1999–2006. *JAMA* 302(19): 2104–10.
- Shay CM, Ning H, Allen NB, Carnethon MR, Chiuve SE, et al. (2012) Status of cardiovascular health in US adults: prevalence estimates from the National Health and Nutrition Examination Surveys (NHANES) 2003–2008. *Circulation* 125: 45–56.
- Hyre AD, Munter P, Menke A, Raggi P, He J (2007) Trends in ATP-III-defined high blood cholesterol prevalence, awareness, treatment and control among U.S. adults. *Ann Epidemiol* 17(7): 548–55.
- Vesper H, Kuiper HC, Mirel LB, Johnson CL, Pirkle JL (2012) Levels of plasma trans fat in non-Hispanic white adults in the United States in 2000 and 2009. *JAMA* 307:562–3.
- Ford ES, Ajani UA, Croft JB, Critchley JA, Labarthe DR, et al. (2007) Explaining the decrease in U.S. deaths from coronary disease, 1980–2000. *N Engl J Med* 356(23): 2388–98.
- Roger VL, Go AS, Lloyd-Jones DM, Adams RJ, Berry JD, et al. (2011) American Heart Association Statistics Committee and Stroke Statistics Subcommittee. Heart disease and stroke statistics—2011 update: a report from the American Heart Association. *Circulation* 123(4): e18–e209.

9. Lloyd-Jones DM, Hong Y, Labarthe D, Mozaffarian D, Appel LJ, et al. (2010) Defining and setting national goals for cardiovascular health promotion and disease reduction: the American Heart Association's Strategic Impact Goal through 2020 and beyond. *Circulation* 121: 586–613.
10. Friedewald WT, Levy RI, Fredrickson DS (1972) Estimation of the concentration of low-density lipoprotein cholesterol in plasma, without use of the preparative ultracentrifuge. *Clin Chem* 18(6): 499–502.
11. Klein RJ, Schoenborn CA (2001) Age-Adjustment Using the 2000 Projected U.S. Population. Statistical notes; no.20. Hyattsville, Maryland: National Center for Health Statistics.
12. U.S. Census Bureau (2001) Census 2000 Summary File 1 United States.
13. National Cholesterol Education Program Expert Panel on Detection, Evaluation, and Treatment of High Blood Cholesterol in Adults, Adult Treatment Panel III; Third Report of the Expert Panel on Detection, Evaluation, and Treatment of High Blood Cholesterol in Adults (ATP III Final Report), National Cholesterol Education Program National Heart, Lung, and Blood Institute, National Institutes of Health, NIH Publication No. 02-5215 (2002) *Circulation* 106: 3143–421.
14. Bender R, Lange S (2001) Adjusting for multiple testing—when and how? *Journal of Clinical Epidemiology* 54(4): 343–9.
15. Briel M, Ferreira-Gonzalez I, You JJ, Karanickolas PJ, Akl EA, et al. (2009) Association between change in high density lipoprotein cholesterol and cardiovascular disease morbidity and mortality: systematic review and meta-regression analysis. *BMJ* 338: b92.
16. Hague W, Forder P, Simes J, Hunt D, Tonkin A (2003) Effect of pravastatin on cardiovascular events and mortality in 1516 women with coronary heart disease: results from the Long-Term Intervention with Pravastatin in Ischemic Disease (LIPID) study. *Am Heart J* 145(4): 643–51.
17. Shepherd J, Blauw GJ, Murphy MB, Bollen ELEM, Buckley BM, et al. (2002) Pravastatin in elderly individuals at risk of vascular disease (PROSPER): a randomized controlled trial. *Lancet* 360(9346): 1623–30.
18. Lewis SJ, Sacks FM, Mitchell JS, East C, Glasser S, et al. (1998) Effect of pravastatin on cardiovascular events in women after myocardial infarction: the Cholesterol And Recurrent Events (CARE) trial. *J Am Coll Cardiol* 32(1): 140–146.
19. Miettinen TA, Pyorala K, Olsson AG, Musliner TA, Cook TJ, et al. (1997) Cholesterol-lowering therapy in women and elderly patients with myocardial infarction or angina pectoris. *Circulation* 96: 4211–8.
20. LaRosa JC, He J, Vupputuri S (1999) Effect of statins on coronary disease: a meta-analysis of randomized controlled trials. *JAMA* 282(24): 2340–6.
21. Cheung BMY, Lauder IJ, Lau CP, Kumana CR (2004) Meta-analysis of large randomized controlled trials to evaluate the impact of statins on cardiovascular outcomes. *Br J Clin Pharmacol* 57(5): 640–51.
22. Clifton PM, Noakes M, Nestel PJ (1994) Gender and diet interactions with simvastatin treatment. *Atherosclerosis* 110(1): 25–33.
23. Jacobson TA, Jocubaitis LA, Amorosa LF (1994) Fluvastatin and niacin in hypercholesterolemia: a preliminary report on gender differences in efficacy. *Am J Med* 96(6): 64S–68S.
24. Nakajima K (1999) Sex-related differences in response of plasma lipids to simvastatin: the Saitama Postmenopausal Lipid Intervention Study. *Clin Ther* 21(12): 2047–57.
25. Mosca L, Banka CL, Benjamin EJ, Berra K, Bushnell C, et al. (2007) Evidence-based guidelines for cardiovascular disease prevention in women: 2007 update. *J Am Coll Cardiol* 49(11): 1230–50.
26. Mosca L, Barrett-Connor E, Wenger NK (2011) Sex/gender differences in cardiovascular disease prevention: what a difference a decade makes. *Circulation* 124: 2145–54.
27. Mosca L, Grundy SM, Judelson D, King K, Limacher M, et al. (1999) Guide to preventive cardiology for women: AHA/ACC Scientific Statement Consensus panel statement. *Circulation* 99: 2480–4.
28. Superko HR, Bachorik PS, Wood PD (1986) High-density lipoprotein cholesterol measurements. *JAMA* 256(19): 2714–7.
